# Supplementary material for: LitInspector: literature and signal transduction pathway mining in PubMed abstracts
Source: PubMed Central journal article supplement — Nucleic Acids Res. 2009 May 5;37(Web Server issue):W135–40. doi: 10.1093/nar/gkp303 (PMC2703902; doi:10.1093/nar/gkp303), 2009-05-05
Supplement: gkp303_1.pdf [file gkp303_1.pdf]

## Evaluation of LitInspector Results

The quality of the LitInspector results was assessed with a published dataset of 181 PubMed sentences which were already used for the evaluation of the tools IHOP and PolySearch. The published dataset can be found at the IHOP webserver:

[http://www.ihop-net.org/UniPub/iHOP/info/gene\\_index/manual/1.html](http://www.ihop-net.org/UniPub/iHOP/info/gene_index/manual/1.html)

| Sentence Number | Number of Genes | True Positives | False Positives | False Negatives | Color Coded LitInspector Output Sentences                                                                                                                                                                                                                                                                                                                              |
|-----------------|-----------------|----------------|-----------------|-----------------|------------------------------------------------------------------------------------------------------------------------------------------------------------------------------------------------------------------------------------------------------------------------------------------------------------------------------------------------------------------------|
| 1               | 2               | 1              |                 | 1               | <b>XRCC3</b> apparently interacted with the N-acetyltransferase type 2 (NAT-2) genotype.                                                                                                                                                                                                                                                                               |
| 2               | 1               | 1              |                 |                 | The data suggest that tissue-specific regulation of aaNAT1 may be associated with different enzymatic functions and do not exclude the possibility of additional aaNAT genes.                                                                                                                                                                                          |
| 3               | 3               | 3              |                 |                 | Using specific antibodies to <b>ABCA2</b> and various organelle marker proteins, <b>ABCA2</b> was found to colocalize with the lysosomal/endosomal marker <b>LAMP1</b> , forming discrete, punctate intracellular vesicles.                                                                                                                                            |
| 4               | 2               | 2              |                 |                 | We report here that gene-specific <b>ABL1 promoter</b> methylation is associated mainly with the P210 form of <b>BCR-ABL</b> and not the P190 form.                                                                                                                                                                                                                    |
| 5               | 2               | 2              |                 |                 | The remaining four genes present in the telomeric region included two known genes, <b>MyD88</b> and <b>ACAA</b> , and two novel genes.                                                                                                                                                                                                                                 |
| 6               | 1               | 1              |                 |                 | No significant difference in tHcy levels and in the prevalence of thermolabile <b>MTHFR</b> was found between patients with non-CAD ischemic stroke and control subjects and between patients with sCAD and non-CAD ischemic stroke.                                                                                                                                   |
| 7               | 4               | 4              |                 |                 | <b>BNaC1</b> is similar to two other BNaC/ASIC family members, <b>BNaC2 (ASIC1)</b> and <b>ASIC4</b> , at its extreme C terminus, and we show that <b>PICK1</b> also interacts with <b>BNaC2</b> .                                                                                                                                                                     |
| 8               | 2               | 1              |                 | 1               | <b>Acrosin</b> was found to be rapidly inhibited by protein C inhibitor with the association rate constant (k <sub>ass</sub> ) for the formation of the complex being (2.41 +/- 0.03) x 10 <sup>(5)</sup> M <sup>-1</sup> s <sup>-1</sup> .                                                                                                                            |
| 9               | 3               | 2              |                 | 1               | A panel of markers of 3 STRs; <b>ACPP</b> , INT 2, and <b>CYP 19</b> (on chromosomes 3, 11, and 15, respectively) were used.                                                                                                                                                                                                                                           |
| 10              | 3               | 3              |                 |                 | By PCR of somatic cell hybrid DNAs, <b>ACTBP9</b> and two beta-actin-related pseudogenes ( <b>ACTBP7</b> and <b>ACTBP8</b> ) were mapped to human chromosomes 18, 15, and 6, respectively.                                                                                                                                                                             |
| 11              | 3               | 3              |                 |                 | Here we describe the identification and characterization of a new gene, <b>WRB</b> , that maps to 21q22.3 between <b>ACTL5</b> and <b>HMG 14</b> and appears to be widely expressed in adult and fetal tissues.                                                                                                                                                        |
| 12              | 0               |                | 2               |                 | <b>CUL-1</b> was found to interact with <b>SKR-1</b> , -2, -3, -7, -8, and -10 in the yeast two-hybrid system.                                                                                                                                                                                                                                                         |
| 13              | 2               | 1              |                 | 1               | The finding of undetectable <b>ACY-1</b> expression in SCLC supports the hypothesis that inactivation of all alleles of specific chromosome 3p genes occurs in a SCLC in a fashion analogous to Rb gene inactivation in <b>retinoblastoma</b> , and suggests that the structural gene for <b>ACY-1</b> may be closely linked to a putative SCLC tumor suppressor gene. |
| 14              | 2               | 1              |                 | 1               | Madm co-immunoprecipitated with <b>Mif1</b> and co-localized in the cytoplasm.                                                                                                                                                                                                                                                                                         |

|    |   |   |   |                                                                                                                                                                                                                                                                                                                              |
|----|---|---|---|------------------------------------------------------------------------------------------------------------------------------------------------------------------------------------------------------------------------------------------------------------------------------------------------------------------------------|
| 15 | 5 | 5 |   | We also confirmed previously reported mapping results of the corresponding human loci <b>ADCY2</b> , <b>ADCY3</b> , <b>ADCY5</b> , and <b>ADCY6</b> to human chromosomes and, in addition, determined the chromosomal location of <b>ADCY4</b> to human Chr 14q11.2.                                                         |
| 16 | 1 | 1 |   | In contrast, treatment with human (h) CG at 2 days after PMSG treatment stimulated ovarian <b>PACAPR</b> messenger RNA within 3-6 h in <b>granulosa cells</b> of preovulatory follicles.                                                                                                                                     |
| 17 | 2 | 1 | 1 | As assayed by gel shift DNA binding studies, the RARE region (-328 to -272 bp) of ADH3 bound the human <b>retinoic acid receptor beta</b> (RAR beta) and was competed for by DNA containing a RARE present in the gene encoding <b>RAR beta</b> .                                                                            |
| 18 | 2 | 2 |   | Conversely, the addition of <b>ET-1</b> induced an increase in the number of endothelial cells that secreted <b>adrenomedullin</b> and CNP.                                                                                                                                                                                  |
| 19 | 2 | 2 |   | First, <b>ADRA1B</b> is on 5q but is several million bases, rather than a few hundred thousand bases, from <b>ADRB2</b> .                                                                                                                                                                                                    |
| 20 | 2 | 2 |   | <b>Adra2r</b> (alpha 2-C10) and <b>Adrb1r</b> (beta 1) receptors mapped to the distal region of mouse chromosome 19.                                                                                                                                                                                                         |
| 21 | 1 | 1 |   | <b>Adenylosuccinate lyase</b> (ASL) deficiency is a defect in purine de novo synthesis pathway.                                                                                                                                                                                                                              |
| 22 | 2 | 2 |   | However, the distribution of <b>CPZ</b> and <b>AEBP1</b> differ in <b>pituitary</b> and <b>thyroid</b> .                                                                                                                                                                                                                     |
| 23 | 4 | 3 | 1 | Two genes, <b>B cell</b> translocation gene1 ( <b>BTG1</b> ) and <b>B cell</b> -specific <b>OCT binding factor-1</b> (OBF-1) were induced > or =1.9-fold in both XLA1 and <b>XLA2</b> analyzed by <b>Atlas</b> filter arrays and Affymetrix chips, respectively.                                                             |
| 24 | 1 | 1 |   | Mapping the soluble <b>angiotensin binding protein</b> (ABP1) locus to porcine chromosome 16.                                                                                                                                                                                                                                |
| 25 | 2 | 2 |   | In peripheral <b>blood lymphocytes</b> , <b>adenosine deaminase</b> was inhibited by 85% to 98% and <b>S-adenosylhomocysteine hydrolase</b> by 51% to 88%.                                                                                                                                                                   |
| 26 | 3 | 3 |   | Monocyte-conditioned medium, recombinant human <b>interleukin-6</b> (rhIL6) and <b>interleukin-1 beta</b> (rhIL1 beta) all down-regulated the synthesis of <b>AHSG</b> .                                                                                                                                                     |
| 27 | 2 | 1 | 1 | Earlier family studies have shown that the locus for <b>AK1</b> is closely linked to the ABO <b>blood</b> group locus and to the locus of the nail-patella (Np) <b>syndrome</b> .                                                                                                                                            |
| 28 | 2 | 2 |   | The current data confirm past observations that the <b>ALAD</b> gene modifies the toxicokinetics of lead and also provides new evidence that the <b>VDR</b> gene does so as well.                                                                                                                                            |
| 29 | 2 | 2 |   | <b>F8C</b> was also tightly linked to <b>ALD</b> with a maximal LOD score of 7.8 without recombination.                                                                                                                                                                                                                      |
| 30 | 2 | 2 |   | In addition, we found that <b>Pax6</b> mutants are devoid of <b>Raldh-3</b> expression.                                                                                                                                                                                                                                      |
| 31 | 1 |   | 1 | Cholesterol regulates ABCD2 expression: implications for the therapy of X-linked <b>adrenoleukodystrophy</b> .                                                                                                                                                                                                               |
| 32 | 2 | 2 |   | <b>ALOXE3</b> and <b>ALOX12B</b> are arranged in a head-to-tail fashion separated by 8.5 kb.                                                                                                                                                                                                                                 |
| 33 | 2 | 2 |   | <b>ALOX15B</b> is located in the same orientation 25 kb downstream of <b>ALOX12B</b> , and is composed of 14 exons and 13 introns spanning a total of 9.7 kb of genomic sequence.                                                                                                                                            |
| 34 | 0 |   |   | However, familial forms of ALS have been described--autosomal dominant forms (ALS1, ALS3), clinically indistinguishable from the sporadic form, and autosomal recessive forms with early onset and slower progression of symptoms (ALS2).                                                                                    |
| 35 | 2 | 2 |   | The strict <b>liver</b> -specific expression of the <b>AMBP</b> gene is controlled by a potent enhancer made of six clustered boxes numbered 1-6 that have been reported to be proven or potential <b>binding sites</b> for the <b>hepatocyte</b> -enriched nuclear factors <b>HNF-1</b> , -4, -3, -1, -3, -4, respectively. |
| 36 | 2 | 2 |   | The mapping of the <b>AMDM</b> locus to human chromosome 9 indicates that <b>AMDM</b> is genetically distinct from the two other mapped acromesomelic dysplasias, Hunter-Thompson type and Grebe type which are caused by mutations in <b>CDMP1</b> on human                                                                 |

|    |   |   |   |                                                                                                                                                                                                                                                                                                                                              |
|----|---|---|---|----------------------------------------------------------------------------------------------------------------------------------------------------------------------------------------------------------------------------------------------------------------------------------------------------------------------------------------------|
|    |   |   |   | chromosome 20.                                                                                                                                                                                                                                                                                                                               |
| 37 | 1 | 1 |   | Ectopic endometrial tissues also produced <b>A2M</b> .                                                                                                                                                                                                                                                                                       |
| 38 | 2 | 2 |   | The two genes represent the corresponding canine orthologs of human <b>aminomethyltransferase</b> (AMT) and the human <b>T-cell leukemia</b> translocation associated ( <b>TCTA</b> ) gene.                                                                                                                                                  |
| 39 | 2 |   | 2 | Amy2/SP2/1 was used to discriminate between Amy1 and Amy2.                                                                                                                                                                                                                                                                                   |
| 40 | 2 |   | 2 | HER2 regulatory control of angiopoietin-2 in breast cancer.                                                                                                                                                                                                                                                                                  |
| 41 | 1 | 1 |   | <b>Alpha-1-antichymotrypsin</b> inhibits the NADPH oxidase-enzyme complex in phorbol ester-stimulated <b>neutrophil membranes</b> .                                                                                                                                                                                                          |
| 42 | 3 | 3 |   | Furthermore, <b>c-Myb</b> and <b>B-Myb</b> enhanced expression of <b>CD13</b> upon PMA treatment.                                                                                                                                                                                                                                            |
| 43 | 2 | 2 |   | The amino-terminal region of <b>annexin A2</b> extends along the concave side of the protein and contains the binding site for the <b>S100A10 (p11)</b> subunit.                                                                                                                                                                             |
| 44 | 5 | 5 |   | The <b>Anx11</b> gene localized to mouse chromosome 14 in close linkage with the <b>Rarb</b> , <b>Plau</b> , and <b>Wnt5a</b> genes near the <b>centromere</b> and 1.8 cM distal from the <b>Anx7</b> gene.                                                                                                                                  |
| 45 | 2 | 2 |   | Recombinant human <b>midkine</b> (rh-midkine) was expressed under the control of the <b>AOX1</b> gene promoter in Pichiapastoris.                                                                                                                                                                                                            |
| 46 | 2 | 2 |   | The protein <b>XB51</b> inhibited the association of <b>X11L</b> with amyloid precursor protein through a non-competitive mechanism and <b>abolished</b> the suppression of beta-amyloid production by <b>X11L</b> .                                                                                                                         |
| 47 | 1 | 1 |   | Coimmunoprecipitation experiments revealed that the AAV Rep78 is physically bound to <b>p53</b> in vivo.                                                                                                                                                                                                                                     |
| 48 | 2 | 2 |   | <b>ABC7</b> protein was shown to be colocalized with <b>ferrochelatase</b> in <b>mitochondria</b> , as assessed by immunostaining.                                                                                                                                                                                                           |
| 49 | 1 |   | 1 | Treatment with PGA1 and even more with PGJ2 remarkably <b>enhanced</b> the synthesis of HSP70 in virus-exposed U937 cells, thus resulting in persistently high levels of HSP70 protein in the cells.                                                                                                                                         |
| 50 | 3 | 3 |   | <b>ArgBP2</b> associates with and is a substrate of <b>Arg</b> and <b>v-Abl</b> , and is <b>phosphorylated</b> on tyrosine in v-Abl-transformed cells.                                                                                                                                                                                       |
| 51 | 3 | 3 |   | Significant differences were observed for <b>acetyl CoA-carboxylase 2</b> and <b>uncoupling protein 2</b> expression ( <b>ACC2</b> : -16.8+/-12.4% vs +51.5+/-32.3% for the intervention and control group respectively; p<0.05) ( <b>UCP2</b> : -26.9+/-10.3% vs +10.5+/-6.2% for the intervention and control group respectively; p<0.05). |
| 52 | ? |   |   | It is suggested that API1 is produced from API3 by an endoprotease.                                                                                                                                                                                                                                                                          |
| 53 | 2 | 2 |   | Overlapping gene structure of human <b>VLCAD</b> and <b>DLG4</b> .                                                                                                                                                                                                                                                                           |
| 54 | 1 | 1 |   | However, monoclonal aCLs (EY1C8 and EY2C9) inhibited the effect of beta2-GPI on fibrinolytic activity; that is, monoclonal aCLs inhibited fibrinolytic activity by elevating <b>PAI-1</b> activity.                                                                                                                                          |
| 55 | 2 | 1 | 1 | We describe a method for measuring <b>apolipoprotein A-I (ApoA-I)</b> associated and unassociated with apolipoprotein A-II (ApoA-II) in <b>plasma</b> .                                                                                                                                                                                      |
| 56 | 1 | 1 |   | Assignment of the <b>aquaporin-8</b> water channel gene ( <b>AQP8</b> ) to human chromosome 16p12.                                                                                                                                                                                                                                           |
| 57 | 2 | 2 |   | Serum <b>haptoglobin</b> appearance during neonatal period is associated with acid phosphatase ( <b>ACP1</b> ) phenotype.                                                                                                                                                                                                                    |
| 58 | 2 | 2 |   | Collagen types I, III, <b>ASMA</b> , and <b>vimentin</b> were detected in the TEHV-leaflets.                                                                                                                                                                                                                                                 |
| 59 | 3 | 3 |   | By PCR of somatic cell hybrid DNAs, <b>ACTBP9</b> and two beta-actin-related pseudogenes ( <b>ACTBP7</b> and <b>ACTBP8</b> ) were mapped to human chromosomes 18, 15, and 6, respectively.                                                                                                                                                   |
| 60 | 3 | 3 |   | The gamma-actin-related pseudogenes were mapped by FISH to chromosomes 3q23 ( <b>ACTGP1</b> ), 20p13 ( <b>ACTGP3</b> ), and 6p21.1 ( <b>ACTGP9</b> ).                                                                                                                                                                                        |

|    |   |   |   |                                                                                                                                                                                                                                                                                           |
|----|---|---|---|-------------------------------------------------------------------------------------------------------------------------------------------------------------------------------------------------------------------------------------------------------------------------------------------|
| 61 | 2 | 2 |   | Cell lines typically co-express <b>ACTN4</b> and <b>ACTN1</b> , a second non-muscle alpha-actinin gene.                                                                                                                                                                                   |
| 62 | 2 | 2 |   | Here we show that beta:beta activin binds to the activin type II receptor kinase ( <b>ActRII</b> ) which induces activin binding to the type I receptor kinase <b>SKR2</b> to form <b>ActRII</b> .beta:beta.SKR2 complexes in which an activin beta chain occupies each receptor subunit. |
| 63 | 1 |   | 1 | Extensively purified human (HeLa) TFIIA interacts with the Ad-2 MLP similarly.                                                                                                                                                                                                            |
| 64 | 1 | 1 |   | We have examined two polymorphisms in the coding sequence of the <b>Notch4</b> gene at positions +1297 and +3063 in a case-control study of 116 AA patients and 142 ethnically matched, healthy control subjects.                                                                         |
| 65 | 2 | 2 |   | Deletion of the <b>ETO</b> C terminus abolishes CoR binding and <b>HDAC</b> recruitment and severely impairs the ability of AML1-ETO to inhibit differentiation of <b>hematopoietic</b> precursors.                                                                                       |
| 66 | 2 | 2 |   | Low editing efficiency of <b>GluR2</b> mRNA is associated with a low relative abundance of <b>ADAR2</b> mRNA in white matter of normal human <b>brain</b> .                                                                                                                               |
| 67 | 1 | 1 |   | <b>ABC50</b> is related to GCN20 and eEF3, two yeast ABC proteins that are not <b>membrane-associated</b> transporters and are instead implicated in mRNA translation and/or its control.                                                                                                 |
| 68 | 1 | 1 | 1 | <b>Ki-ras</b> oncogenes were detected in spontaneous and chemically induced <b>lung tumors</b> obtained from the C3A and <b>AC3</b> mice.                                                                                                                                                 |
| 69 | 2 |   | 2 | However, the ADH2 genotype did not seem to influence drinking frequency or amounts of alcohol intake in each ALDH2 genotype.                                                                                                                                                              |
| 70 | 2 | 1 | 1 | Mammalian <b>alcohol dehydrogenase</b> of higher classes: analyses of human ADH5 and rat <b>ADH6</b> .                                                                                                                                                                                    |
| 71 | 1 | 1 |   | Mapping of a human A2a adenosine receptor ( <b>ADORA2</b> ) to chromosome 22.                                                                                                                                                                                                             |
| 72 | 2 | 1 | 1 | These findings suggest that it is H antigen expression that mediates the ABO effect on <b>plasma vWF</b> concentration.                                                                                                                                                                   |
| 73 | 2 | 2 |   | Detailed physical analysis of a 1.5-megabase YAC contig containing the <b>MX11</b> and <b>ADRA2A</b> genes.                                                                                                                                                                               |
| 74 | 1 | 1 |   | The cDNA for mouse long-chain acyl-CoA dehydrogenase ( <b>Acadl</b> , gene symbol; <b>LCAD</b> , enzyme) was cloned and characterized.                                                                                                                                                    |
| 75 | 2 | 2 |   | Three SNPs (803T>C of AGT, 677CT of <b>MTHFR</b> , 190T>C of <b>ADRB3</b> ) showed weak differences in allelic frequency.                                                                                                                                                                 |
| 76 | 4 | 4 |   | Additional experiments showed that all-trans-retinoic acid causes large induction of the transcription factor <b>STAT1</b> , while <b>IFN-gamma</b> causes activation of <b>STAT1</b> such that it binds to the GAS/Sp1 site in the <b>ACAT-1</b> P1 promoter.                            |
| 77 | 1 | 1 |   | Several peptide fragments are produced by proteolytic cleavage of the opioid peptide precursor <b>proenkephalin A</b> , and among these are a number of enkephalin fragments, in particular bovine <b>adrenal medulla</b> peptide 22 (BAM22).                                             |
| 78 | 1 | 1 |   | The results described in the present study suggest that mAEG ( <b>CRISP1</b> ) is secreted in the monkey <b>epididymis</b> , regulated by androgens and present on epididymal <b>spermatozoa</b> .                                                                                        |
| 79 | 2 | 2 |   | This raises the possibility that <b>AGC1</b> and <b>mel-CSPG</b> may be the same gene.                                                                                                                                                                                                    |
| 80 | 2 | 2 |   | Interaction between BR-1 and <b>ATP citrate lyase</b> was blocked by radicicol but not by herbimycin A that interacts with <b>Hsp90</b> .                                                                                                                                                 |
| 81 | 1 | 1 |   | Prior treatment of <b>neutrophils</b> with <b>ACP2</b> also reduced by 45% the amount of diacylglycerol they produced when stimulated by fMLP.                                                                                                                                            |
| 82 | 0 |   |   | Based on the molecular weights of the proteins detected, the strains were divided into two groups with Ami (groups Ami1 [75% of the strains] and Ami2 [21%]) and into four groups with ActA (groups ActA1 [52% of the strains], ActA2 [18%], ActA3 [30%] and                              |

|     |   |   |   |                                                                                                                                                                                                                                                                                                        |
|-----|---|---|---|--------------------------------------------------------------------------------------------------------------------------------------------------------------------------------------------------------------------------------------------------------------------------------------------------------|
|     |   |   |   | ActA4 [one strain isolated from food]).                                                                                                                                                                                                                                                                |
| 83  | 1 | 1 | 1 | We found a 4 bp <b>ACTC</b> deletion between nucleotides 1464 and 1467 in the second exon of the normal <b>DAX-1</b> sequence.                                                                                                                                                                         |
| 84  | 2 |   | 2 | The human AGRP decapeptide Yc[CRFFNAFC]Y has been previously reported as binding to the human MC3 and MC4 receptors and antagonizing the MC4 receptor.                                                                                                                                                 |
| 85  |   |   |   | duplicated sentence 61.                                                                                                                                                                                                                                                                                |
| 86  | 2 | 2 |   | <b>ACTN2</b> is the human homolog of a previously characterized chicken gene while <b>ACTN3</b> represents a novel gene product.                                                                                                                                                                       |
| 87  | 2 | 2 |   | Here, we show that <b>CFTR</b> activates <b>aquaporin 3</b> expressed endogenously and exogenously in <b>oocytes</b> of <i>Xenopus laevis</i> .                                                                                                                                                        |
| 88  | 1 | 1 |   | In view of its ancient pedigree and a potential involvement in cellular architecture, we propose that the <b>ARCN1</b> protein be named <b>archain</b> .                                                                                                                                               |
| 89  | 2 |   | 2 | The introduction of hARF4 to the cells maintained the balance between cytosolic and <b>membrane</b> -associated Sec7p pools.                                                                                                                                                                           |
| 90  | 2 | 2 |   | Thus, <b>NOS2</b> and <b>Arg1</b> might act separately or synergistically in vivo to control specific types of <b>T-cell</b> responses, and selective antagonists of these enzymes might prove beneficial in fighting <b>diseases</b> in which <b>T-cell</b> responses are inappropriately suppressed. |
| 91  | 3 | 2 | 1 | Of the type II receptors, <b>SNX6</b> was found to interact strongly with <b>ActRIIB</b> and more moderately with wild type and kinase-defective mutants of TbetaRII.                                                                                                                                  |
| 92  | 2 | 2 |   | These results suggest that <b>RhoE</b> may act to inhibit <b>signalling</b> downstream of <b>RhoA</b> , altering some <b>RhoA</b> -regulated responses, such as <b>stress fiber</b> formation, but not affecting others, such as peripheral actin bundle formation.                                    |
| 93  | 2 | 2 |   | These results suggest that <b>ARHGAP6</b> has two independent functions: one as a GAP with specificity for <b>RhoA</b> and the other as a cytoskeletal protein that promotes actin remodeling.                                                                                                         |
| 94  | 3 | 3 |   | Specific interactions between <b>ARL1</b> and two binding proteins, <b>SCOCO</b> and <b>Golgin-245</b> , are defined and characterized in more detail.                                                                                                                                                 |
| 95  | 2 | 2 |   | The <b>AhR</b> is a ligand-activated partner of the <b>ARNT</b> protein.                                                                                                                                                                                                                               |
| 96  | 1 | 1 | 1 | The grade of <b>cathepsin B</b> staining was significantly increased in <b>AHDs</b> and CAs, compared with ADs (P < .0001).                                                                                                                                                                            |
| 97  | 2 | 2 |   | <b>AIF-1</b> colocalizes with <b>Rac1</b> , and <b>AIF-1</b> -transduced VSMCs show a constitutive and enhanced activation of <b>Rac1</b> , providing a mechanism for the increased migration.                                                                                                         |
| 98  | 2 | 1 | 1 | The AK3 locus is however, probably syntenic with the <b>AK1</b> locus, on chromosome 9.                                                                                                                                                                                                                |
| 99  | 1 | 1 |   | Four new mutations in the erythroid-specific 5-aminolevulinate synthase ( <b>ALAS2</b> ) gene causing X-linked sideroblastic anemia: increased pyridoxine responsiveness after removal of <b>iron overload</b> by phlebotomy and coinheritance of hereditary <b>hemochromatosis</b> .                  |
| 100 | 2 | 2 |   | Comparative analysis of the <b>RED1</b> and <b>RED2</b> A-to-I RNA editing genes from mammals, pufferfish and zebrafish.                                                                                                                                                                               |
| 101 | 5 | 5 |   | We also confirmed previously reported mapping results of the co responding human loci <b>ADCY2</b> , <b>ADCY3</b> , <b>ADCY5</b> , and <b>ADCY6</b> to human chromosomes and, in addition, determined the chromosomal location of <b>ADCY4</b> to human Chr 14q11.2.                                   |
| 102 | 2 | 1 | 1 | <b>NUP98</b> is fused to adducin 3 in a patient with <b>T-cell</b> acute lymphoblastic <b>leukemia</b> and myeloid markers, with a new translocation t(10;11)(q25;p15).                                                                                                                                |
| 103 | 2 | 1 | 1 | Identified <b>regulatory</b> loci are known to affect the expression of <b>Adh-1</b> and Adh-3, which are closely linked on chromosome 3.                                                                                                                                                              |
| 104 | 3 |   | 3 | The reaction was made specific for arylsulfatase A by inhibiting arylsulfatase C activity with low pH and arylsulfatase B activity with pyrophosphate.                                                                                                                                                 |
| 105 | 2 | 2 |   | Expression of the <b>ARSF</b> cDNA in COS cells resulted in a heat-labile arylsulfatase activity                                                                                                                                                                                                       |

|     |   |   |   |                                                                                                                                                                                                                                                                                                                                                                                                        |
|-----|---|---|---|--------------------------------------------------------------------------------------------------------------------------------------------------------------------------------------------------------------------------------------------------------------------------------------------------------------------------------------------------------------------------------------------------------|
|     |   |   |   | that is not inhibited by warfarin, supporting our hypothesis that only <b>ARSE</b> is specifically inhibited by warfarin and is most likely involved in warfarin embryopathy.                                                                                                                                                                                                                          |
| 106 | 1 | 1 |   | <b>RyR2</b> mutations suggested to cause defective Ca <sup>2+</sup> channel function have recently been identified in catecholaminergic polymorphic <b>ventricular tachycardia</b> (CPVT) and <b>arrhythmogenic right ventricular dysplasia</b> (ARVD) affected individuals.                                                                                                                           |
| 107 | 1 | 1 | 1 | A polymorphic <b>PstI</b> site is assigned to the fourth intron of the <b>ADH4</b> gene.                                                                                                                                                                                                                                                                                                               |
| 108 | 1 | 1 | 1 | Six families were excluded from all four known <b>BBS</b> loci, indicating that there is at least a fifth <b>BBS</b> locus ( <b>BBS5</b> ).                                                                                                                                                                                                                                                            |
| 109 | 2 | 2 |   | <b>Adenosine A2B receptor signalling</b> is altered by stimulation of <b>bradykinin</b> or interleukin receptors in astroglia cells.                                                                                                                                                                                                                                                                   |
| 110 | 2 | 2 |   | Subtype-specific probes to the murine homologs of the human <b>ADRA2B</b> and <b>ADRA2C</b> genes were prepared by PCR amplification and used to map these two genes to mouse chromosomes 2 and 5, respectively.                                                                                                                                                                                       |
| 111 | 3 | 3 |   | Large variations were found in mRNA expression of <b>LH1</b> and <b>LH2</b> but not <b>LH3</b>                                                                                                                                                                                                                                                                                                         |
| 112 | 1 |   | 1 | We have isolated the human homolog of the bacterial arsA (hARSA-I), a member of the ATPase superfamily with no transmembrane domain.                                                                                                                                                                                                                                                                   |
| 113 | 2 | 2 |   | The results of these experiments place <b>ASSP1</b> sequences on human chromosome 6, <b>IFNB3</b> on human chromosome 8, and <b>DBI</b> on human chromosome 6.                                                                                                                                                                                                                                         |
| 114 | 1 | 1 |   | G protein-coupled receptor kinase 2 ( <b>GRK2</b> ) is a key modulator of G protein-coupled receptors (GPCR).                                                                                                                                                                                                                                                                                          |
| 115 | 2 | 2 |   | The gene for the <b>CLAPB1</b> large subunit was mapped to 17q11.2-q12 by PCR amplification of an <b>AP2 beta</b> fragment from a panel of rodent-human hybrid DNAs.                                                                                                                                                                                                                                   |
| 116 | 3 | 3 |   | Chromosomal locations of three human nuclear genes ( <b>RPSM12</b> , <b>TUFM</b> , and <b>AFG3L1</b> ) specifying putative components of the mitochondrial gene expression apparatus.                                                                                                                                                                                                                  |
| 117 | 1 | 1 |   | This region of the <b>POMC</b> gene is involved in the control of constitutive <b>POMC</b> gene expression since mutation of the PO-B DNA-binding site severely reduces transcription from the <b>POMC</b> promoter both in vivo and in vitro (Riegel, A.                                                                                                                                              |
| 118 |   |   |   | Duplicated sentence 69.                                                                                                                                                                                                                                                                                                                                                                                |
| 119 | 2 | 2 |   | The structure of two human aldehyde dehydrogenase genes, <b>ALDH7</b> and <b>ALDH8</b> , have been determined.                                                                                                                                                                                                                                                                                         |
| 120 | 3 | 3 |   | Using the same method, four of the genes ( <b>GHR</b> , <b>PRLR</b> , <b>ALDOB</b> , and <b>MUSK</b> ) were assigned to the Japanese quail Z chromosome.                                                                                                                                                                                                                                               |
| 121 | 2 | 2 |   | <b>ATF4</b> is a mediator of the nutrient-sensing response pathway that activates the human <b>asparagine synthetase</b> gene.                                                                                                                                                                                                                                                                         |
| 122 | 2 | 2 |   | More <b>RERE</b> protein is recruited into nuclear aggregates of the <b>DRPLA</b> protein with extended polyglutamine than into those of pure polyglutamine.                                                                                                                                                                                                                                           |
| 123 | 2 | 2 |   | <b>Epidermal growth factor</b> enhances transcription of human <b>arachidonate 12-lipoxygenase</b> in A431 cells.                                                                                                                                                                                                                                                                                      |
| 124 | 2 | 2 |   | Overall, the results do not support linkage of <b>bipolar disorder</b> to the Na(+),K(+)-ATPase alpha subunit gene ( <b>ATP1A3</b> ) and beta subunit gene ( <b>ATP1B3</b> ) in these old-order Amish families and they show that these Na(+),K(+)-ATPase subunit genes are not major effect genes (>or=fourfold increased genetic risk of <b>disease</b> ) for BPAD in the old-order Amish pedigrees. |
| 125 |   |   |   | Duplicated sentence 124.                                                                                                                                                                                                                                                                                                                                                                               |
| 126 | 1 | 1 |   | TaqI polymorphisms at the annexin VIII locus ( <b>ANX8</b> ).                                                                                                                                                                                                                                                                                                                                          |
| 127 | 3 | 2 | 1 | Both <b>c-Rel</b> and <b>RelA</b> induced jagged1 gene expression, whereas a mutant defective for transactivation did not.                                                                                                                                                                                                                                                                             |
| 128 | 2 | 2 |   | Modulation of <b>SERCA2</b> activity: regulated splicing and interaction with <b>phospholamban</b> .                                                                                                                                                                                                                                                                                                   |
| 129 | 2 | 2 |   | Instead double immunofluorescence demonstrated that <b>TNSAI P</b> (N153D) partially co-                                                                                                                                                                                                                                                                                                               |

|     |   |   |     |                                                                                                                                                                                                                                                                                                                                                                                      |
|-----|---|---|-----|--------------------------------------------------------------------------------------------------------------------------------------------------------------------------------------------------------------------------------------------------------------------------------------------------------------------------------------------------------------------------------------|
|     |   |   |     | localized with a cis-Golgi marker (GM-130) at the steady-state.                                                                                                                                                                                                                                                                                                                      |
| 130 | 6 | 5 | 1   | their location and expression patterns make TMOD2 and TMOD3 candidate genes for amyotrophic lateral sclerosis 5 (ALS5) and dyslexia-1 (DYX1) and TMOD4 a candidate gene for limb girdle muscular dystrophy 1B (LGMD1B).                                                                                                                                                              |
| 131 | 1 | 1 |     | The survival motor neuron (SMN) gene was lacking in 6/12 patients with arthrogyposis multiplex congenita (AMC) associated with spinal muscular atrophy (SMA).                                                                                                                                                                                                                        |
| 132 | 2 | 2 |     | We have found that PMCA1 and PMCA4 genes were expressed in 8-, 12- and 20-week fetal heart and in adult heart.                                                                                                                                                                                                                                                                       |
| 133 | 2 | 2 |     | These data suggest that ATPe triggers IL-1 beta via the purinergic P2Z receptor recently shown to be expressed by human macrophages and identified as a new member of the P2X family (P2X7), and provide pharmacologic tools for the modulation of IL-1 beta release in vitro and, possibly, in vivo.                                                                                |
| 134 | 2 |   | 2   | The peroxisomal targeting sequence type 1 receptor, Pex5p, and the peroxisomal import efficiency of alanine:glyoxylate aminotransferase.                                                                                                                                                                                                                                             |
| 135 | 3 | 3 |     | In vitro translated AHNAK fragment could be cleaved by granzyme B and caspase-3.                                                                                                                                                                                                                                                                                                     |
| 136 | 2 | 2 |     | In preclinical studies, arginine vasopressin (AVP) has been shown to increase a range of social behaviors, including affiliation and attachment, via the V(1a) receptor (AVPR1A) in the brain.                                                                                                                                                                                       |
| 137 | 1 | 1 |     | Cytochrome P450 2D6 (CYP2D6) has been documented as the major target antigen of liver kidney microsomal autoantibodies type-1 (anti-LKM-1) in both autoimmune hepatitis type-2 (AIH-2) and hepatitis C (HCV).                                                                                                                                                                        |
| 138 | 2 | 2 |     | Gas6 bound to HUVECs; soluble Axl inhibited this binding.                                                                                                                                                                                                                                                                                                                            |
| 139 | 1 | 1 |     | 0.1 100 ng of defensins and 1.0 100 ng/ml CAP37 were able to stimulate in vitro T-cell chemotaxis.                                                                                                                                                                                                                                                                                   |
| 140 | 3 | 3 |     | Finally, MLK3-mediated JNK activation is inhibited by AKT1.                                                                                                                                                                                                                                                                                                                          |
| 141 | 3 | 3 |     | Based upon this structural comparison, we establish that DBP is a member of the ALB and AFP gene family.                                                                                                                                                                                                                                                                             |
| 142 | 1 | 1 |     | The adenosine monophosphate deaminase locus (AMPD1) was selected for study.                                                                                                                                                                                                                                                                                                          |
| 143 | 3 | 2 | 1   | The long haplotype spans about 300 kb and contains six additional genes arranged in two repeats, each one consisting of two salivary amylase genes (AMY1A and AMY1B) and a pseudogene lacking the first three exons (AMYP1).                                                                                                                                                         |
| 144 | 2 |   | 2   | The purpose of this study was to ascertain whether any of the Prader Willi Angelman Chromosome Region (PWCR and ANCR, respectively) loci were duplicated in these patients.                                                                                                                                                                                                          |
| 145 | 3 | 2 | 1 1 | In these IL-2R beta c-expressing cells, BAG-1 mRNA was dramatically induced by IL-2.                                                                                                                                                                                                                                                                                                 |
| 146 | 2 | 2 |     | Immunohistochemical analysis of P53 and CDN1 was performed.                                                                                                                                                                                                                                                                                                                          |
| 147 | 2 | 2 |     | We found 44% of families linked to 11q13 (BBS1) and 17% linked to 16q21 (BBS2).                                                                                                                                                                                                                                                                                                      |
| 148 | 2 | 2 |     | Localization and function(s) of ocular ALDH1 and ALDH3 isozymes.                                                                                                                                                                                                                                                                                                                     |
| 149 | 3 | 3 |     | K(m) and V(max) values for 10 coenzyme analogs never previously studied with any aldehyde dehydrogenase and NADP(+) were compared with those for NAD(+) for three human aldehyde dehydrogenases (EC 1.2.1.3); the cytoplasmic E1 (the product of the ald1 gene), the mitochondrial E2 (the product of the ald2 gene) and the cytoplasmic E3 (the product of the ald9 gene) isozymes. |
| 150 | 2 | 2 |     | Western blotting of extracts from brain, heart, kidney, liver, lung, prostate, skeletal muscle, small intestine, spleen and testis showed that AKR7A2 is present in all of the organs examined, and AKR1B1 is similarly widely distributed in human tissues.                                                                                                                         |
| 151 | 2 | 2 |     | Promoter polymorphism in the 5-lipoxygenase (ALOX5) and 5-lipoxygenase-activating protein (ALOX5AP) genes and asthma susceptibility in a Caucasian population.                                                                                                                                                                                                                       |
| 152 | 3 | 3 | 1   | A multilocus linkage analysis of RFLP data from a single WS1 family with 11 affected                                                                                                                                                                                                                                                                                                 |

|     |   |   |   |                                                                                                                                                                                                                                                                                                               |
|-----|---|---|---|---------------------------------------------------------------------------------------------------------------------------------------------------------------------------------------------------------------------------------------------------------------------------------------------------------------|
|     |   |   |   | individuals indicates that the <b>WS1</b> mutation in this family is linked to the following four marker loci located on the long arm of chromosome 2: <b>ALPP</b> (alkaline phosphatase, placental), <b>FN1</b> (fibronectin 1), D2S3 (a unique-copy DNA segment), and <b>COL6A3</b> (collagen VI, alpha 3). |
| 153 | 1 | 1 |   | Combined restriction landmark genomic scanning and virtual genome scans identify a novel human homeobox gene, <b>ALX3</b> , that is hypermethylated in <b>neuroblastoma</b> .                                                                                                                                 |
| 154 | 2 | 1 | 1 | NF1 binding correlated with the disappearance of <b>ANT2</b> transcripts in quiescent cells.                                                                                                                                                                                                                  |
| 155 | 2 | 2 |   | Genomic locations of <b>ANX11</b> and <b>ANX13</b> and the evolutionary genetics of human annexins.                                                                                                                                                                                                           |
| 156 | 2 | 2 |   | Given that the <b>FHIT</b> gene at 3p14.2, which encodes a diadenosine 5',5'''-P1,P3-triphosphate (AP3A) hydrolase, is a candidate <b>tumor</b> suppressor, <b>APAH1</b> should also be considered a potential <b>tumor</b> suppressor.                                                                       |
| 157 | 2 | 1 | 1 | Thus, it is likely that the PI domains present in the C-terminal moiety of the hFE65L protein bind the NPXY motif located in the cytoplasmic domain of beta PP and <b>APLP2</b> .                                                                                                                             |
| 158 | 2 | 2 |   | <b>AMD1</b> was localized to chromosome region 6q21-->q22 and <b>AMD2</b> to band Xq28.                                                                                                                                                                                                                       |
| 159 | 2 | 1 | 1 | BCGF enhanced <b>transferrin receptor</b> expression by phorbol ester-activated <b>B cells</b> .                                                                                                                                                                                                              |
| 160 | 2 | 2 |   | <b>GzmA</b> cleaves <b>Ape1</b> after Lys31 and destroys its known oxidative repair functions.                                                                                                                                                                                                                |
| 161 | 2 | 2 |   | The <b>AMFR</b> expression appears to be associated with <b>VEGF</b> expression.                                                                                                                                                                                                                              |
| 162 | 3 | 3 |   | Mutations in the human BCKD genes E1alpha ( <b>BCKDHA</b> ), E1beta ( <b>BCKDHB</b> ) and E2 ( <b>DBT</b> ) are known to result in MSUD, referred to as type Ia, Ib and II mutations respectively.                                                                                                            |
| 163 | 2 | 2 |   | We found that the PI domain of <b>Dab1</b> interacts with the <b>amyloid precursor-like protein 1 (APLP1)</b> .                                                                                                                                                                                               |
| 164 | 1 | 1 |   | We have defined here amino acids of <b>amphiphysin 1</b> crucial for binding to AP-2 and clathrin.                                                                                                                                                                                                            |
| 165 | 2 |   | 2 | Three types of variants were observed for Amy1, one type for Amy2.                                                                                                                                                                                                                                            |
| 166 | 1 | 1 |   | The functional differences between <b>Ang</b> and <b>Angrp</b> , together with evidence presented herein that <b>Angrp</b> is regulated differently than <b>Ang</b> , suggest that the roles of the two proteins in vivo may be quite distinct.                                                               |
| 167 | 2 | 2 |   | Spectrin binds both <b>Ank1</b> and <b>Ank3</b> avidly, as expected.                                                                                                                                                                                                                                          |
| 168 | 2 | 2 |   | Interestingly, a homologue of <b>ANT3</b> , <b>ANT2</b> , maps to Xq and is subject to X-inactivation.                                                                                                                                                                                                        |
| 169 | 2 | 2 |   | The Polycomb-group protein <b>ENX-2</b> interacts with <b>ZAP-70</b> .                                                                                                                                                                                                                                        |
| 170 | 2 | 2 |   | Fractional deacylation of LPS by incubation with <b>acyloxyacyl hydrolase</b> isolated from human <b>leukocytes</b> produced a <b>reduction</b> in the capacity of LPS to induce <b>TNF</b> release in whole <b>blood</b> .                                                                                   |
| 171 | 2 | 2 |   | Conditioned media containing secreted <b>apoF</b> demonstrated <b>CETP</b> inhibitor activity, whereas cells transfected with vector alone did not.                                                                                                                                                           |
| 172 | 2 | 1 | 1 | Rates were higher in rapid versus slow acetylators when catalysed by <b>NAT2</b> but not when catalysed by <b>NAT1</b> .                                                                                                                                                                                      |
| 173 | 2 | 2 |   | The activation of naive <b>B cells</b> by <b>CD40L</b> induced transient expression of <b>Bcl-xL</b> .                                                                                                                                                                                                        |
| 174 | 2 | 2 |   | <b>LRBA</b> , a human gene with a ubiquitous expression pattern mapping to 4q32, encodes a protein closely related to <b>BCL8</b> .                                                                                                                                                                           |
| 175 | 2 | 2 |   | The purpose of this investigation was to elucidate the clinicopathologic characteristics of <b>BRCA1</b> - and <b>BRCA2</b> -associated hereditary <b>breast carcinomas</b> (HBCs) in Japanese women.                                                                                                         |
| 176 | 2 | 1 | 1 | These results may suggest that <b>hABCA1</b> regulates actin organization through the possible interaction with <b>Cdc42Hs</b> .                                                                                                                                                                              |
| 177 | 1 | 1 |   | These data reveal that missense <b>ABCR</b> mutations may be associated with RP.                                                                                                                                                                                                                              |



|     |     |     |    |    |                                                                                                                                                                                                                                                                                                                                                                                       |
|-----|-----|-----|----|----|---------------------------------------------------------------------------------------------------------------------------------------------------------------------------------------------------------------------------------------------------------------------------------------------------------------------------------------------------------------------------------------|
| 178 | 2   | 2   |    |    | ABR probably corresponds to the brain-enriched 100-kDa GAP for Rac and Cdc42Hs previously detected.                                                                                                                                                                                                                                                                                   |
| 179 | 3   | 3   |    |    | Nuclear receptor response element-1 (NRRE-1) from the human medium-chain acyl coenzyme A dehydrogenase (MCAD) gene promoter was shown to contain three hexamer elements (site 1 through 3) that are known to interact with a number of nuclear receptors including chicken ovalbumin upstream promoter transcription factor (COUP-TF) and estrogen-related receptor alpha (ERRalpha). |
| 180 |     |     |    |    | Duplicated sentence 7.                                                                                                                                                                                                                                                                                                                                                                |
| 181 | 1   | 1   |    |    | Recombinant IRP-1 represses aconitase synthesis with similar efficiency as ferritin IRE-controlled translation.                                                                                                                                                                                                                                                                       |
| Sum | 350 | 303 | 10 | 47 |                                                                                                                                                                                                                                                                                                                                                                                       |

**Formulas:**

**Precision** = true positives / (true positives + false positives)

**Recall** = true positives / number of genes

**F-measure** = 2 \* precision \* recall / (precision + recall)

**Results for LitInspector:**

**Precision** = 303 / (303 + 10) = 96.8 %

**Recall** = 303 / 350 = 86.6 %

**F-measure** = 2 \* 96.8 \* 86.6 / (96.8 + 86.6) = 91.4 %

<http://www.litinspector.org/>
